# Supplementary material
Source: Springer Nature journal article supplement (https://www.springermedizin.de/resource/supplementary/12890_2014_663_MOESM3_ESM.pdf/9505380)

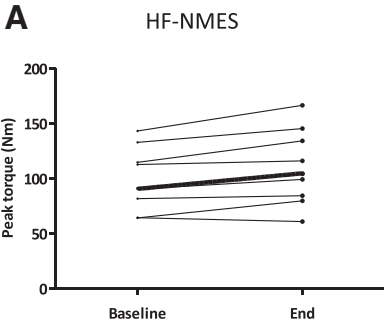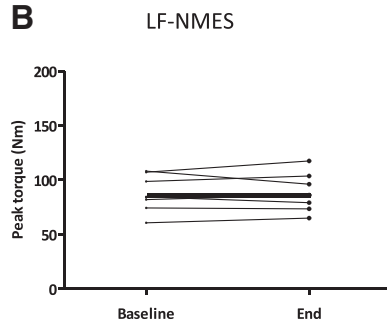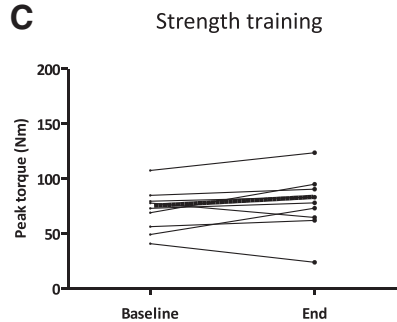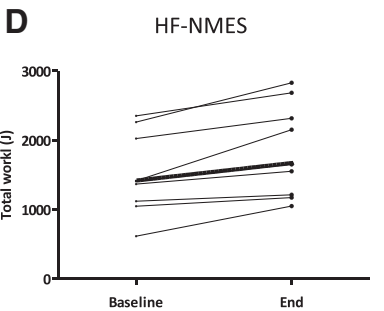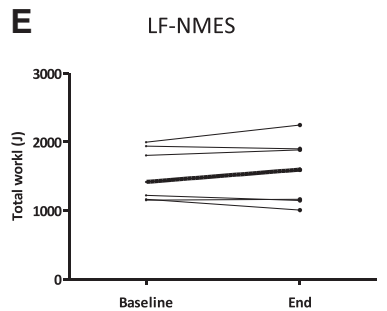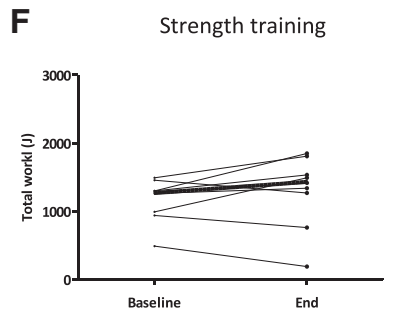

Supplement: MOESM3 [file 9505380]
